# Supplementary material for: Irreversible topological transition of a stretched superhelix: the interplay of chiralities
Source: Royal Society of Chemistry journal article supplement (doi:10.1039/c9sm01027k), 2019-01-01
Supplement: c9sm01027k1.pdf [file c9sm01027k1.pdf]

*Supporting Information for*  
**Irreversible Topological Transition of a Stretched Superhelix:  
The Interplay of Chiralities**

Saeed Najafi\*

*Department of Chemical and Biomolecular Engineering,  
University of Pennsylvania, Philadelphia, PA 19104, United States*

**MODEL**

The superhelix monomers are connected to their first neighbors by means of stiff bonds. The only non-bonded interaction to which the monomers are subject is a short-ranged excluded volume, enforcing steric hindrance and preventing the chain from the self crossing. This standard model of the polymers is then provided with bending and torsion potentials, whose reference angles are parametrized based on a native structure. We use the standard Kremer-Grest model of chains [1, 2]. The superhelix chain is described as a collection of identical monomers, connected by FENE bonds [3]. The only non-bonded interaction among the monomers is a purely repulsive Weeks-Chandler-Anderson (WCA) [4] potential. Triplets and quadruplets of subsequent monomers interact *via* bending and torsion potentials, respectively.

The total potential energy of the system is:

$$\mathcal{V} = U_{\text{WCA}} + U_{\text{FENE}} + U_{\text{bending}} + U_{\text{torsion}} \quad (1)$$

The WCA potential is given by:

$$U_{\text{WCA}} = \frac{1}{2} \sum_{(i,j), j \neq i}^N V(d_{i,j}) \quad (2)$$

$$V(r) = \begin{cases} 4\epsilon \left[ \left(\frac{\sigma}{r}\right)^{12} - \left(\frac{\sigma}{r}\right)^6 + \frac{1}{4} \right] & \text{for } r \leq 2^{1/6}\sigma \\ 0 & \text{otherwise} \end{cases}$$

and the FENE potential reads:

$$U_{\text{FENE}} = - \sum_{i=0}^{N-2} \frac{\kappa_{\text{fene}}}{2} \left(\frac{R_0}{\sigma}\right)^2 \ln \left[ 1 - \left(\frac{d_{i,i+1}}{R_0}\right)^2 \right] \quad (3)$$

where  $d_{i,i+1} = |\vec{r}_i - \vec{r}_{i+1}|$  is the distance of the monomer centers  $i$  and  $i+1$ ,  $R_0$  is the maximum bond length and  $\kappa_{\text{fene}}$  is the FENE interaction strength. Note that the diameter  $\sigma$  of the monomer is taken as the length unit, and corresponds to the separation between two consecutive monomers; all distances are expressed in reduced units. The WCA strength  $\epsilon$  is taken as the energy unit, and the FENE bond constant  $\kappa_{\text{fene}}$  was set to  $30\epsilon$  as it is customary for the Kremer-Grest model [1, 2].

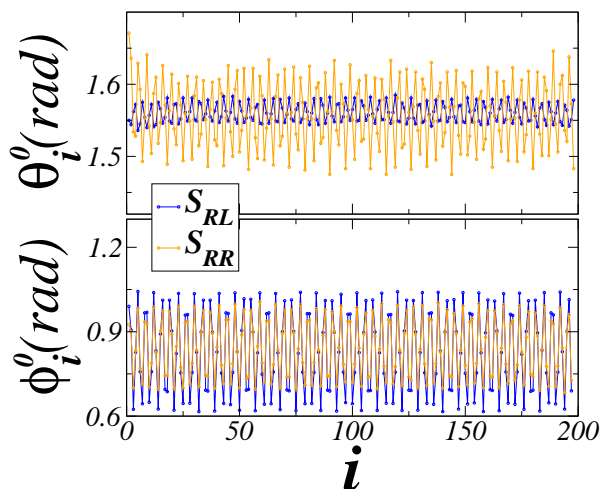

FIG. 1. In this plot we show the distribution of the intermolecular bending ( $\theta_i^0$ ) and torsional ( $\phi_i^0$ ) angles of the superhelices in their native state for  $\kappa_{\text{bend}} = \kappa_{\text{tor}} = 100k_B T$ , where  $i$  is the index of the monomers of the superhelix.

The bending and torsion potentials are:

$$U_{\text{bending}} = \sum_{i=1}^{N-2} \kappa_{\text{bend}} (\theta_i - \theta_i^0)^2$$

$$U_{\text{torsion}} = \sum_{i=1}^{N-3} U_i^{\text{tor}} \quad (4)$$

with:

$$U_i^{\text{tor}} = \kappa_{\text{tor}} \left( \cos(\phi_i - \phi_i^0) + \frac{1}{3} \cos(3(\phi_i - \phi_i^0)) \right)$$

$\theta_i^0$  and  $\phi_i^0$  are the bending and torsion angle of the  $i$ -th monomer in the native states, respectively.  $\kappa_{\text{bend}}$  and  $\kappa_{\text{tor}}$  are the corresponding bending and torsion stiffness, respectively.

In Fig. 3, we show the distribution of the bending ( $\theta_i^0$ ) and torsional ( $\phi_i^0$ ) angles of the superhelices in their native state. As it is evident from plot, the  $S_{RR}$  possesses a broader distribution of  $\theta_i^0$  in comparison to the  $S_{RL}$ , while the opposite trend is weakly observed for  $\phi_i^0$ . This feature of the superhelices reveals their statics due to the topology in the native state, which barely manifests itself in the intermolecular bending and torsion angles. Similarly, in Fig. 2, we show the bending ( $\theta_i^S$ ) and tor-

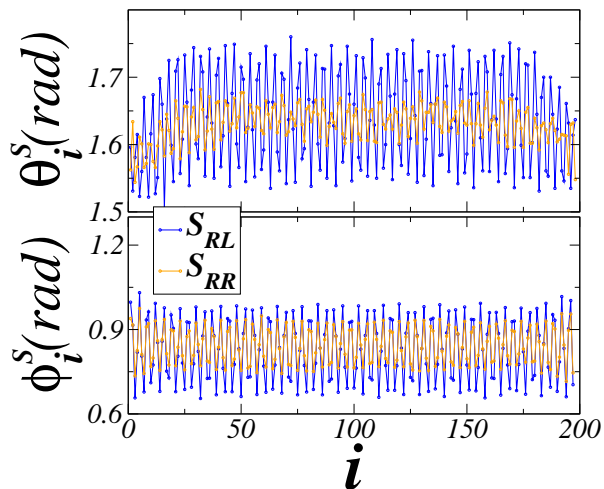

FIG. 2. In this plot we show the distribution of the intermolecular bending ( $\theta_i^S$ ) and torsional ( $\phi_i^S$ ) angles of the superhelices in the stretched state, where  $i$  is the index of the monomers of the superhelix (in this plot the  $S_{RR}$  after stretching switch its topology to  $S_{RL}$ ), with having set  $\kappa_{bend} = \kappa_{tor} = 100k_B T$  and  $d = 70\sigma$ .

sional ( $\phi_i^S$ ) angles of the superhelices in the stretched state of the superhelices. The angles of the stretched  $S_{RR}$  is shown after the topology transition when the superhelix is equilibrated. Interestingly, the opposite trend of the bending angles in the native state is observed in the stretched state.

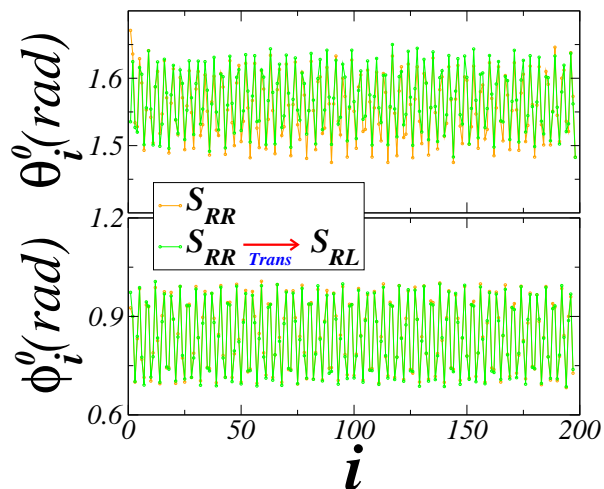

FIG. 3. In this plot we show the distribution of the intermolecular bending ( $\theta_i^0$ ) and torsional ( $\phi_i^0$ ) angles of the  $S_{RR}$  in the un-stretched state before and after the topology transition at  $\kappa_{bend} = \kappa_{tor} = 100k_B T$ , where  $i$  is the index of the monomers of the superhelix.

## SIMULATION METHOD

The potential of Eq. 1 is employed to perform overdamped Molecular Dynamics simulations in implicit solvent by means of the following Langevin equations of motion:

$$-\frac{\partial \mathcal{V}_i}{\partial \vec{r}_i(t)} - m\gamma \vec{v}_i(t) + \vec{R}(t) = 0 \quad (5)$$

where  $m$ ,  $v_i$ ,  $\mathcal{V}_i$ ,  $\gamma$ ,  $R_i$  and  $r_i$  are the mass, velocity, local potential energy, friction coefficient, random force and coordinate of the  $i$ -th monomer, respectively. The equations of motion of the system are integrated with a symplectic, first order algorithm [5]. The system parameters are listed in Table I.

In order to investigate how the stretching of the superhelices along the  $z$ -axis affect the superhelix's topology we performed different sets of simulations. We stretched the end of the superhelix by applying a constant force to  $\{0, 0, d\}$  while the other end is fixed at  $\{0, 0, 0\}$  without clamping. For each  $d$  of the superhelices, we ran 40 independent simulations to characterize and quantify the topology transition. A single simulation runs according to the following steps:

1. The superhelices with the uniform elasticity and identical radius  $\sim 3.4\sigma$  (with 200 monomers) are initialized and equilibrated in the native state, at which the ends of the superhelices are fixed without clamping at  $\{0, 0, 0\}$  and  $\{0, 0, 8.6\sigma\}$ .
2. We fix one end of the superhelix and stretch the other end to  $\{0, 0, d\}$ , with an appropriate stretching force, which does not affect the helical structure of the superhelix chains while ensuring that the stretched end of the superhelix has reached  $\{0, 0, d\}$ .
3. We run the simulations long enough such that the stretched superhelices reach the equilibrium state and feature a plateau of the potential energy landscape.

As for the release, we take the final configuration of the equilibrated stretched superhelix and set the  $z$  component of the stretching force equal to *zero*, and let the superhelix to relax and reach the native bending and torsional angles.

## TOPOLOGY ANALYSIS

The topological state of the superhelices have been characterized using the the writhe of the coarse grained chains [6], which is a descriptor of the net sign of the superhelices chirality:

| Parameter                                                   | Value             |
|-------------------------------------------------------------|-------------------|
| $m$                                                         | 1                 |
| $\epsilon$                                                  | 1                 |
| MD time unit $\tau_{MD} = \sigma \sqrt{\frac{m}{\epsilon}}$ | 1                 |
| $\Delta t$ [ $\tau_{MD}$ ]                                  | $2 \cdot 10^{-3}$ |
| $R_0$ [ $\sigma$ ]                                          | 1.5               |
| $\kappa_{fene}$ [ $\epsilon$ ]                              | 30                |
| $\tau_{frict}$ [ $\tau_{MD}$ ]                              | 1                 |
| $T$ [ $\frac{\epsilon}{k_B}$ ]                              | 0.1               |

TABLE I. System parameters.

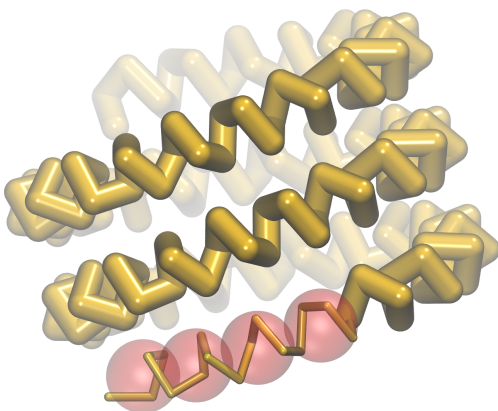

FIG. 4. The transparent red spheres show the center mass of the every 4 consecutive monomers of the superhelix. The total number of the coarse grained monomers of the superhelix with 200 monomers that are used to calculate the  $Wr$ , is  $N_c = 50$ .

$$Wr = 2 \sum_{i=2}^{N_c} \sum_{i < j} \frac{\Omega_{ij}}{4\pi}, \quad (6)$$

where  $\Omega_{ij}/4\pi$  is the Gauss integral along the coarse grained segments  $i, j$  and  $N_c$  is the total number of coarse grained segments of the superhelix monomers. For  $Wr < 0$  and  $Wr > 0$ , the net chirality of the superhelix is left and right-handed, respectively. The coarse grained chain is basically identified as the collection of the center mass of every 4 consecutive monomers of the superhelixes, as shown in Fig. 3. In our analysis, we take into account the fact that the topology change of the superhelixes is independent of the helix chirality, *i.e.* during the topology transition the chirality of the helix remains unchanged. In order to ascertain the chirality transition of the stretched superhelix, we simultaneously quantify the

total potential energy of the superhelices; at the end of

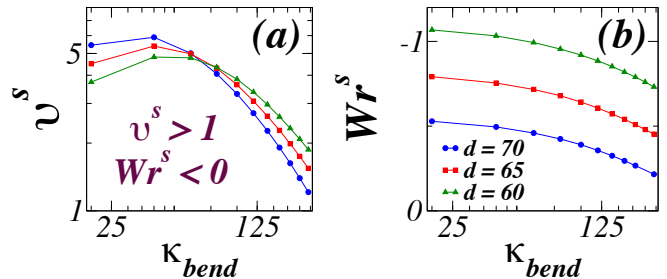

FIG. 5. Plot (a) and (b) indicate  $v$  and  $Wr$  of the  $S_{RL}$  in the equilibrated stretched state as a function of  $\kappa_{bend}$  for  $\frac{d}{\sigma} = 70, 65, 60$  at  $\kappa_{tor} = 100k_B T$ . As it shown in plots, we invariably have :  $v^s > 1$  and  $Wr^s < 0$  (with no topology transition).

transition the stretched superhelix reaches an equilibrium state with constant conformational energy.

### THE STRETCHED $S_{RL}$

In Fig. 5, we show the  $v^s$  of the stretched  $S_{RL}$  as a function of  $\kappa_{bend}$ , at  $d = 70$  and  $\kappa_{tor} = 100k_B T$ . As it is shown in the plot, for every value of the bending stiffness the  $v^s$  is larger than 1, which implies that the torsion induced strain of the superhelix is smaller than the bending induces tension, which has a component perpendicular to the stretching plane. This characteristic of the  $S_{RL}$  due to its topology, give rise to substantially lower conformational energy of the stretched superhelix in compare to the  $S_{RR}$  in the regime where the topology transition can not occur at the same  $\kappa_{bend}$ ,  $\kappa_{tor}$  and  $d$  values. We should mention that after the topology transition, the released superhelix at equilibrium (with topology of the  $S_{RL}$ ), still has the tilted conformation in relative to the  $z$ -axis due to its forcefield and more importantly, stretching the superhelix once again does not give rise to topology transition..

\* snajafi@seas.upenn.edu

- [1] G. S. Grest and K. Kremer, Phys. Rev. A **33**, 3628 (1986).
- [2] K. Kremer and G. S. Grest, The Journal of Chemical Physics **92**, 5057 (1990).
- [3] M. Bishop, M. H. Kalos, and H. L. Frisch, The Journal of Chemical Physics **70**, 1299 (1979).
- [4] J. D. Weeks, D. Chandler, and H. C. Andersen, The Journal of Chemical Physics **54**, 5237 (1971).
- [5] D. C. Rapaport, *The Art of Molecular Dynamics Simulation*, 2nd ed. (Cambridge University Press, 2004).
- [6] K. Klenin and J. Langowski, Biopolymers **54**, 307 (2000).
